# Supplementary material for: In Vivo Reflectance Confocal Microscopy as a Response Monitoring Tool for Actinic Keratoses Undergoing Cryotherapy and Photodynamic Therapy
Source: MDPI journal article supplement (doi:10.3390/cancers13215488), 2021-10-31
Supplement: s1 [file s1]

# Supplementary Materials: In Vivo Reflectance Confocal Microscopy as a Response Monitoring Tool for Actinic Keratoses Undergoing Cryotherapy and Photodynamic Therapy

Clara Curiel-Lewandrowski, Caitlyn N. Myrdal, Kathylynn Saboda, Chengcheng Hu, Edith Arzberger, Giovanni Pellacani, Franz Josef Legat, Martina Ulrich, Petra Hochfellner, Margaret C. Oliviero, Paola Pasquali, Melissa Gill and Rainer Hofmann-Wellenhof

**Table S1.** Percent prevalence among reads at baseline.

| Skin Layer      | RCM Parameter                            | PD skin | Grade 1 AK | Grade 2 AK | All AK   |
|-----------------|------------------------------------------|---------|------------|------------|----------|
| Stratum Corneum | Parakeratosis                            | 27.7%   | 69.2% **   | 67.4% **   | 68.4% ** |
|                 | Hyperkeratosis                           | 12.8%   | 60.4% **   | 72.7% **   | 66.3% ** |
|                 | Stratum Corneum Disruption               | 26.1%   | 71.2% **   | 75.5% **   | 73.3% ** |
| Epidermis       | Atypical Honeycomb Pattern               | 69.6%   | 98.2% **   | 98.1% **   | 98.2% ** |
|                 | Round Nucleated Cells                    | 9.1%    | 23.2%      | 14.0% *    | 18.9%    |
|                 | Disarranged Epidermal Pattern            | 16.1%   | 50.9% **   | 60.8% **   | 55.6% ** |
|                 | Presence of Inflammatory Epidermal Cells | 38.9%   | 55.4% *    | 60.0%      | 57.5% *  |
|                 | Presence of Dendritic Cells              | 13.0%   | 10.9%      | 14.3%      | 12.5%    |
| Dermis          | Inflammatory Infiltrate Dermis           | 32.7%   | 63.6%      | 47.1% *    | 55.7% *  |
|                 | Solar Elastosis                          | 78.4%   | 92.5%      | 84.8%      | 88.9%    |
|                 | Round Blood Vessels                      | 61.8%   | 69.6% *    | 75.5%      | 72.5% *  |
|                 | Polymorphous Blood Vessels               | 16.4%   | 41.1% *    | 35.3% *    | 38.3% ** |

Significance compared to PD skin. \* $p < 0.05$ , \*\* $p < 0.01$ .

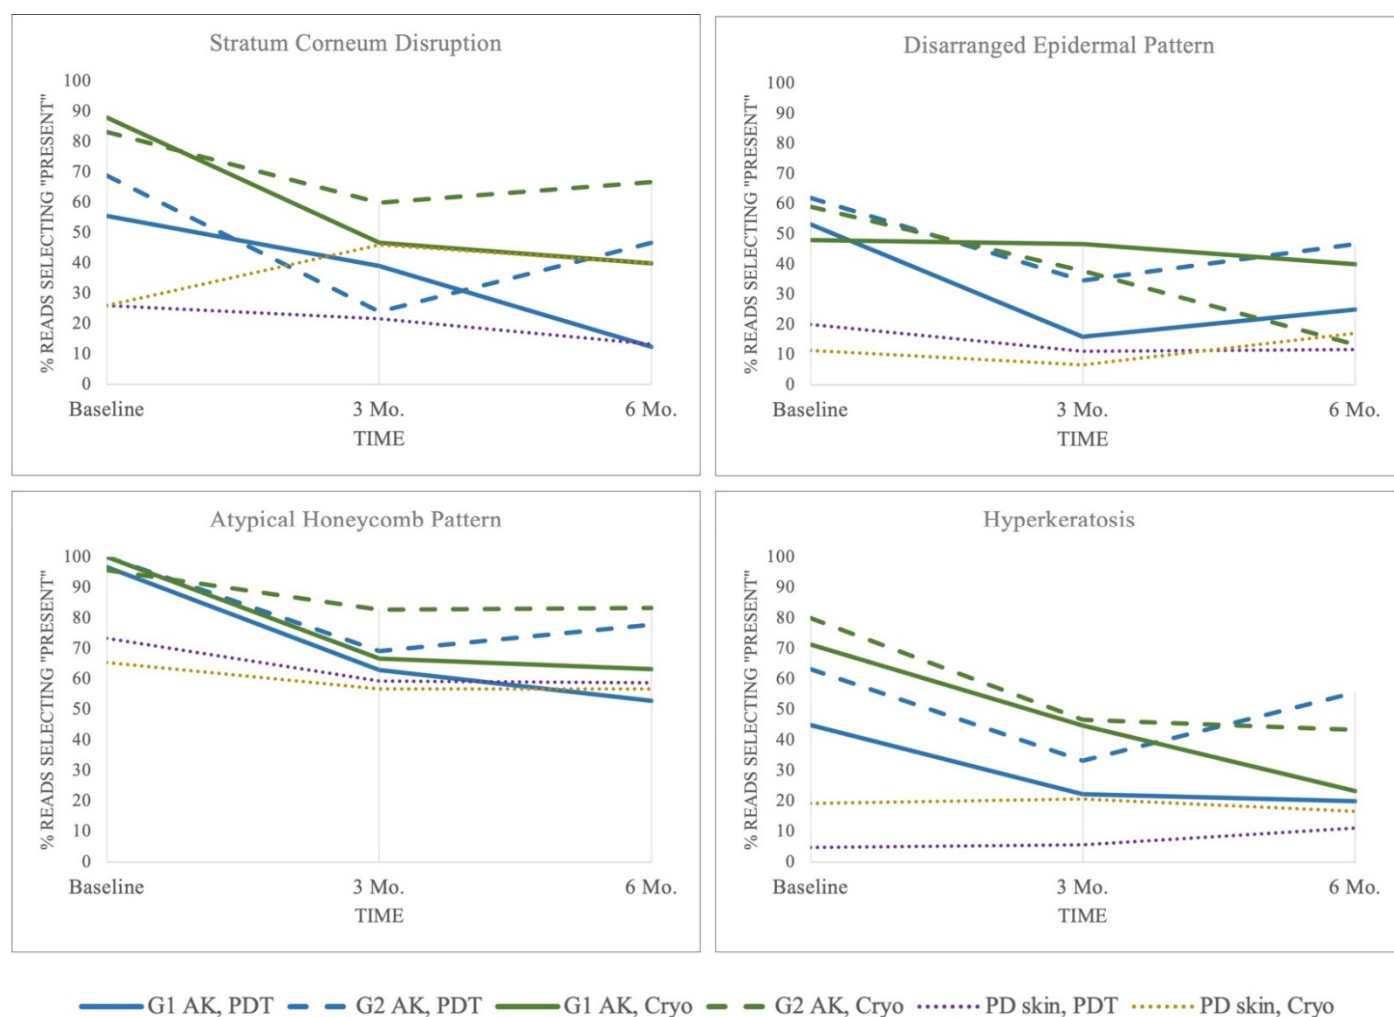

**Figure S1.** Graphical representation of key RCM criteria over time.
